# Supplementary material for: New luminescent rare earth activated oxynitridosilicates and oxynitridogermanates with the apatite structure
Source: Royal Society of Chemistry journal article supplement (doi:10.1039/c2jm35168d), 2012-01-01

## Rietveld refinement data from X-ray powder diffraction for $\text{La}_{8.9}\text{Ce}_{0.1}\text{SrSi}_6\text{NO}_{25}$

### Crystal data

|                                              |                          |
|----------------------------------------------|--------------------------|
| Space group                                  | $P6_3/m$ (N° 176), $Z=1$ |
| $a(\text{Å})$                                | 9.7008(4)                |
| $c(\text{Å})$                                | 7.2401(4)                |
| Cell volume ( $\text{Å}^3$ )                 | 590.06                   |
| Calculated density( $\text{g}/\text{cm}^3$ ) | 5.459                    |

### Atomic coordinates and isotropic displacement parameters (in $\text{Å}^2$ )

| Atom  | Wyckof site | x/a       | y/b       | z/c         | occupancy <sup>1</sup> | B <sup>2</sup> |
|-------|-------------|-----------|-----------|-------------|------------------------|----------------|
| La(1) | 4f          | 0.33330   | 0.66670   | -0.0032(15) | 0.493                  | 0.5            |
| Sr(1) | 4f          | 0.33330   | 0.66670   | -0.0032(15) | 0.167                  | 0.5            |
| Ce(1) | 4f          | 0.33330   | 0.66670   | -0.0032(15) | 0.007                  | 0.5            |
| La(2) | 6h          | 0.0121(7) | 0.2449(5) | 0.25000     | 0.990                  | 0.5            |
| Ce(2) | 6h          | 0.0121(7) | 0.2449(5) | 0.25000     | 0.110                  | 0.5            |
| Si    | 6h          | 0.403(2)  | 0.377(3)  | 0.25000     | 1.000                  | 0.5            |
| O(1)  | 6h          | 0.329(5)  | 0.479(5)  | 0.25000     | 0.962                  | 0.5            |
| N(1)  | 6h          | 0.329(5)  | 0.479(5)  | 0.25000     | 0.038                  | 0.5            |
| O(2)  | 6h          | 0.597(5)  | 0.473(5)  | 0.25000     | 0.962                  | 0.5            |
| N(2)  | 6h          | 0.597(5)  | 0.473(5)  | 0.25000     | 0.038                  | 0.5            |
| O(3)  | 12i         | 0.342(3)  | 0.261(3)  | 0.072(4)    | 1.922                  | 0.5            |
| N(3)  | 12i         | 0.342(3)  | 0.261(3)  | 0.072(4)    | 0.077                  | 0.5            |
| O(4)  | 2a          | 0.00000   | 0.00000   | 0.25000     | 0.320                  | 0.5            |
| N(4)  | 2a          | 0.00000   | 0.00000   | 0.25000     | 0.013                  | 0.5            |

<sup>1</sup> Normalized to 1 Si according with the site multiplicity.

<sup>2</sup> The temperature factors were fixed to  $0.5 \text{ Å}^2$  because of correlations with absorption effects.

### Selected bond distances (Å)

|                                  |          |
|----------------------------------|----------|
| La(1)/Sr(1)/Ce(1)-O(1)/N(1) (x2) | 2.57(3)  |
| La(1)/Sr(1)/Ce(1)-O(1)/N(1)      | 2.57(4)  |
| La(1)/Sr(1)/Ce(1)-O(2)/N(2) (x2) | 2.53(3)  |
| La(1)/Sr(1)/Ce(1)-O(2)/N(2)      | 2.53(4)  |
| La(1)/Sr(1)/Ce(1)-O(3)/N(3) (x3) | 2.91(3)  |
| La(2)/Ce(2)-O(1)/N(1)            | 2.76(4)  |
| La(2)/Ce(2)-O(2)/N(2)            | 2.47(6)  |
| La(2)/Ce(2)-O(3)/N(3) (x2)       | 2.48(3)  |
| La(2)/Ce(2)-O(3)/N(3) (x2)       | 2.64(3)  |
| La(2)/Ce(2)-O(4)/N(4)            | 2.319(6) |
| Si-O(1)/N(1)                     | 1.48(7)  |
| Si-O(2)/N(2)                     | 1.63(5)  |
| Si-O(3)/N(3) (x2)                | 1.62(3)  |

|                                                |      |      |       |
|------------------------------------------------|------|------|-------|
| $N_p, N_{\text{refl}}, N_{\text{irefl}}^{(a)}$ | 4750 | 502  | 252   |
| $P_p, P_i, P_g^{(b)}$                          | 5    | 13   | 10    |
| $R_{\text{Bragg}}, R_F, \chi^2$                | 13.2 | 11.5 | 1.70  |
| $R_p, R_{\text{wp}}, R_{\text{exp}}^{(c)}$     | 33.2 | 36.8 | 28.17 |

(a)  $N_p, N_{\text{refl}}, N_{\text{irefl}}$  refer to the number of experimental points, total reflections and independent reflections respectively.

(b)  $P_p, P_i, P_g$ , refer to the number of profile, intensity-dependent and global refined parameters, respectively. The profile fitting of the data was performed with a pseudo-Voigt function, including asymmetry and preferred orientation corrections.

(c) Conventional Rietveld R-factors ( $R_p, R_{\text{exp}}$ ) are calculated by using background corrected counts.

### Observed and calculated X-ray diffraction patterns for the compound $\text{La}_{8.9}\text{Ce}_{0.1}\text{SrSi}_6\text{NO}_{25}$

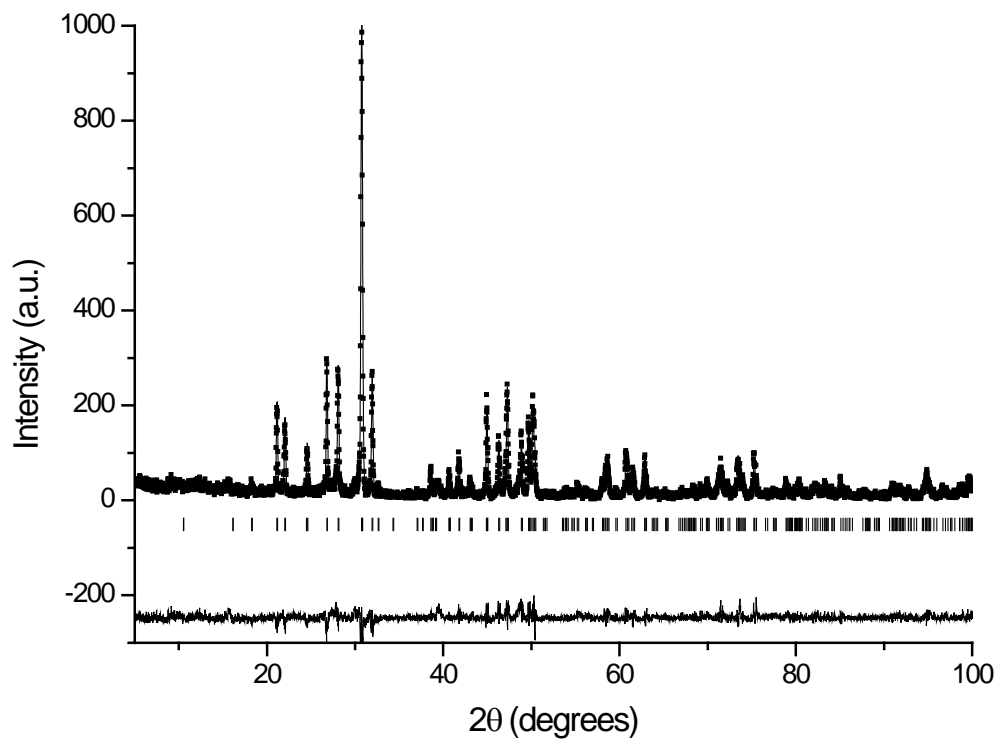

Supplement: c2jm35168d.pdf [file c2jm35168d.pdf]
